# Supplementary material for: Venom composition of Trimeresurus albolabris, T. insularis, T. puniceus and T. purpureomaculatus from Indonesia
Source: PubMed Central journal article supplement (PMC9261747; doi:10.1590/1678-9199-jvatitd-2021-0103), 2022-07-06
Supplement: 1678-9199-jvatitd-28-e20210103-s1.pdf [file 1678-9199-jvatitd-28-e20210103-s1.pdf]

## Supplementary Material to “Venom composition of *Trimeresurus albolabris*, *T. insularis*, *T. puniceus* and *T. purpureomaculatus* from Indonesia”

**Additional file 1.** Summary of detected proteins from the in-gel digestion proteins (gel sections 1–10) of *T. albolabris* venom by LC-MS/MS analysis.

| No | Accession  | Protein family | Protein name                                            | Organism                               | Gel section                   | Unique peptide |   |
|----|------------|----------------|---------------------------------------------------------|----------------------------------------|-------------------------------|----------------|---|
| 1  | A0A077L7D6 | SVMP           | Metalloprotease P-IIIa (Fragment)                       | <i>Protobothrops elegans</i>           | A5                            | 2              |   |
| 2  | A0A098M132 | PIII Class     | Metalloproteinase (Type III) 8c                         | <i>Hypsiglena</i> sp.                  | A1-A4                         | 2              |   |
| 3  | A0A194AMC0 |                | Metalloproteinase type III 9b                           | <i>Agkistrodon piscivorus</i>          | A1, A2, A4, A5, A6            | 2              |   |
| 4  | P0C6E8     |                | Zinc metalloproteinase/disintegrin (Fragment)           | <i>Trimeresurus gramineus</i>          | A6                            | 2              |   |
| 5  | Q3HTN1     |                | Zinc metalloproteinase-disintegrin-like stejnihagin-A   | <i>Trimeresurus stejnegeri</i>         | A2, A4                        | 2,6            |   |
| 6  | Q3HTN2     |                | Zinc metalloproteinase-disintegrin-like stejnihagin-B   | <i>Trimeresurus stejnegeri</i>         | A4                            | 2              |   |
| 7  | Q4VM08     |                | Zinc metalloproteinase-disintegrin-like VLAIP-A         | <i>Macrovipera lebetina</i>            | A4                            | 2              |   |
| 8  | E9KJZ5     |                | Group III snake venom metalloproteinase                 | <i>Echis ocellatus</i>                 | A3                            | 2              |   |
| 9  | Q2LD49     | PII Class      | Zinc metalloproteinase-disintegrin-like TSV-DM          | <i>Trimeresurus stejnegeri</i>         | A1-6                          | 4,5,7,8        |   |
| 10 | A0A194ARM6 |                | Metalloproteinase type II 4                             | <i>Agkistrodon piscivorus</i>          | A1                            | 2              |   |
| 11 | A0A194ARK7 |                | Metalloproteinase type III 8                            | <i>Agkistrodon piscivorus</i>          | A5                            | 2              |   |
| 12 | P0C6B6     |                | Zinc metalloproteinase homolog-disintegrin albolatin    | <i>Trimeresurus albolabris</i>         | A1, A4, A5, A6                | 2,3,4          |   |
| 13 | P15503     |                | Zinc metalloproteinase/disintegrin                      | <i>Trimeresurus gramineus</i>          | A1                            | 2              |   |
| 14 | P0DM87     |                | Zinc metalloproteinase-disintegrin stejnitin            | <i>Trimeresurus stejnegeri</i>         | A1, A6, A7                    | 3              |   |
| 15 | A0A194AT10 | CTL            | C-type lectin 10a                                       | <i>Sistrurus miliarius barbouri</i>    | A1                            | 5              |   |
| 16 | A0A194AS97 |                | C-type lectin 10b                                       | <i>Sistrurus miliarius barbouri</i>    | A10                           | 4              |   |
| 17 | A0A077LD73 |                | C-type lectin F IX/X B                                  | <i>Protobothrops flavoviridi</i>       | A1, A10                       | 2              |   |
| 18 | Q9YGPI     |                | C-type lectin TsL                                       | <i>Trimeresurus stejnegeri</i>         | A1, A10                       | 3              |   |
| 19 | P81115     |                | Snaclec alboaggregin-B subunit alpha                    | <i>Trimeresurus albolabris</i>         | A1, A2, A3, A4, A6, A10       | 2              |   |
| 20 | P81116     |                | Snaclec alboaggregin-B subunit beta                     | <i>Trimeresurus albolabris</i>         | A5, A8, A9                    | 2,3            |   |
| 21 | P0DM38     |                | Snaclec alboaggregin-D subunit alpha                    | <i>Trimeresurus albolabris</i>         | A1, A2, A4, A5, A6, A9, A10   | 2,3,5          |   |
| 22 | P0DM39     |                | Snaclec alboaggregin-D subunit beta                     | <i>Trimeresurus albolabris</i>         | A1                            | 2              |   |
| 23 | Q7LZ71     |                | Snaclec coagulation factor IX-binding protein subunit A | <i>Protobothrops flavoviridis</i>      | A1, A10                       | 2              |   |
| 24 | D1MGU0     |                | Snaclec jerdonibitin subunit alpha                      | <i>Protobothrops jerdonii</i>          | A1                            | 2              |   |
| 25 | P0DJL2     |                | Snaclec purpureotin subunit alpha                       | <i>Trimeresurus purpureomaculatus</i>  | A1, A2, A3, A6, A9, A10       | 2,3,4,5,6      |   |
| 26 | I2GAE3     |                | CTLs subunit alpha (Fragment)                           | <i>Gloydus halys</i>                   | A1                            | 2              |   |
| 27 | O13060     |                | SVSP                                                    | Snake venom serine protease 2A homolog | <i>Trimeresurus gramineus</i> | A6             | 2 |

| No | Accession  | Protein family        | Protein name                             | Organism                            | Gel section                   | Unique peptide |
|----|------------|-----------------------|------------------------------------------|-------------------------------------|-------------------------------|----------------|
| 28 | O13061     |                       | Snake venom serine protease 2B           | <i>Trimeresurus gramineus</i>       | A1, A2, A4, A5, A6            | 2,4            |
| 29 | O13062     |                       | Snake venom serine protease 2C           | <i>Trimeresurus gramineus</i>       | A1                            | 2              |
| 30 | P0CJ41     |                       | Alpha-fibrinogenase albofibrase          | <i>Trimeresurus albolabris</i>      | A1-7                          | 4,5,7,8,9      |
| 31 | A7LAC6     |                       | Thrombin-like enzyme 1                   | <i>Trimeresurus albolabris</i>      | A3-4                          | 2,3            |
| 32 | A7LAC7     |                       | Thrombin-like enzyme 2                   | <i>Trimeresurus albolabris</i>      | A4-5                          | 2,4            |
| 33 | P0DJF5     |                       | Venom plasminogen activator GPV-PA       | <i>Trimeresurus albolabris</i>      | A5-6                          | 3,5            |
| 34 | P0DJF6     |                       | Thrombin-like enzyme chitribisin         | <i>Trimeresurus albolabris</i>      | A4                            | 2              |
| 35 | G3DT18     | PLA2                  | Acidic phospholipase A2 BmooPLA2         | <i>Bothrops moojeni</i>             | A1                            | 2              |
| 36 | A0A096XPP1 |                       | Acidic phospholipase A2 isoform a        | <i>Gloydus intermedius</i>          | A3                            | 2              |
| 37 | Q6H3C5     |                       | Basic phospholipase A2 Ts-G6D49          | <i>Trimeresurus stejnegeri</i>      | A10                           | 2              |
| 38 | A0A0H3U245 |                       | Phospholipase A2                         | <i>Trimeresurus albolabris</i>      | A1, A4, A8, A10               | 3,4,5          |
| 39 | A0A0H3U1W7 |                       | Phospholipase A2                         | <i>Trimeresurus cardamomensis</i>   | A1                            | 4              |
| 40 | A7X4P4     |                       | PLA2(IIA)-Aze2                           | <i>Azemiops feae</i>                | A6                            | 2              |
| 41 | A0A194APL9 |                       | 5'-NUC                                   | Snake venom 5'-nucleotidase         | <i>Agkistrodon piscivorus</i> | A3             |
| 42 | A0A214HXH5 | Venom 5'-nucleotidase |                                          | <i>Naja atra</i>                    | A3                            | 2              |
| 43 | T1E3Y5     | Ecto-5'-nucleotidase  |                                          | <i>Crotalus horridus</i>            | A3                            | 2              |
| 44 | A0A077L7M9 | 5'-nucleotidase       |                                          | <i>Protobothrops flavoviridis</i>   | A1, A4                        | 2,3            |
| 45 | K9N7B7     | LAAO                  | L-amino acid oxidase Cdc18 (Fragment)    | <i>Crotalus durissus cumanensis</i> | A1, A4                        | 2              |
| 46 | A0A194APV2 |                       | L-amino acid oxidase                     | <i>Agkistrodon piscivorus</i>       | A3                            | 2              |
| 47 | Q6WP39     |                       | L-amino-acid oxidase                     | <i>Trimeresurus stejnegeri</i>      | A1, A4                        | 2              |
| 48 | A0A346CLX5 | PDE                   | Phosphodiesterase (Fragment)             | <i>Borikenophis portoricensis</i>   | A2, A3                        | 2              |
| 49 | W8E7D1     |                       | Phosphodiesterase                        | <i>Macrovipera lebetina</i>         | A2                            | 4              |
| 50 | T2HPD6     |                       | Phosphodiesterase                        | <i>Protobothrops flavoviridis</i>   | A1, A2, A3                    | 3,5,6          |
| 51 | A0A1W7RB94 | PLB                   | Phospholipase B-like                     | <i>Crotalus adamanteus</i>          | A5                            | 3              |
| 52 | A0A077L7E7 |                       | Phospholipase B-like                     | <i>Protobothrops elegans</i>        | A1, A4, A6                    | 3,6,9          |
| 53 | U3TDL2     | QPCT                  | Glutaminyl cyclase (Fragment)            | <i>Ovophis okinavensis</i>          | A5                            | 8              |
| 54 | A0A0K8S0L7 |                       | Glutaminyl-peptide cyclotransferases     | <i>Crotalus horridus</i>            | A4                            | 12             |
| 55 | A0A068EPZ2 | AO                    | Amine oxidase                            | <i>Gloydus intermedius</i>          | A1, A2, A4, A6                | 3,4            |
| 56 | T2HRS5     |                       | Amine oxidase                            | <i>Protobothrops flavoviridis</i>   | A1-7                          | 2,5,6,7,9      |
| 57 | F2Q6F7     | CRISP                 | Cysteine-rich secretory protein Ts-CRPyA | <i>Trimeresurus stejnegeri</i>      | A1, A7, A9, A10               | 2              |
| 58 | A0A098M1X7 | Actin                 | Actin, alpha 2, smooth muscle            | <i>Hypsiglena sp.</i>               | A2                            | 4              |
| 59 | V8P395     | GPx                   | Glutathione peroxidase (Fragment)        | <i>Ophiophagus hannah</i>           | A8                            | 3              |
| 60 | A0A077L6N8 | Aminopeptidase        | Aminopeptidase                           | <i>Protobothrops elegans</i>        | A2                            | 7              |
| 61 | V8N4Y2     | Endonuclease          | Endonuclease domain-containing 1 protein | <i>Ophiophagus hannah</i>           | A6                            | 2              |
| 62 | T2HPR2     | NGF                   | Nerve growth factor                      | <i>Ovophis okinavensis</i>          | A10                           | 3              |
| 63 | Q5NTZ2     | Albumin               | Serum albumin                            | <i>Protobothrops flavoviridis</i>   | A4                            | 5              |
| 64 | A0A0F7Z1V6 | Transferrin           | Transferrin                              | <i>Crotalus adamanteus</i>          | A1, A3                        | 3,5            |

SVMP, snake venom metalloproteinase; SVSP, snake venom serine protease; PLA2, phospholipase A2; CTL, snake C-type lectin; CRISP, cysteine-rich protein; LAAO, L-amino acid oxidase; PDE, phosphodiesterase; 5'-NUC, 5'-nucleotidase; endonuclease, endonuclease domain-containing 1 protein; PLB, phospholipase B; AO, amine oxidase; QPCT, glutaminyl-peptide cyclotransferase; NGF, nerve growth factor; GPx, glutathione peroxidase
