# Supplementary material for: Venom composition of Trimeresurus albolabris, T. insularis, T. puniceus and T. purpureomaculatus from Indonesia
Source: PubMed Central journal article supplement (PMC9261747; doi:10.1590/1678-9199-jvatitd-2021-0103), 2022-07-06
Supplement: 1678-9199-jvatitd-28-e20210103-s2.pdf [file 1678-9199-jvatitd-28-e20210103-s2.pdf]

## Supplementary Material to “Venom composition of *Trimeresurus albolabris*, *T. insularis*, *T. puniceus* and *T. purpureomaculatus* from Indonesia”

**Additional file 2.** Summary of detected proteins from the in-gel digested proteins (gel sections 1–10) of *T. insularis* venom by LC-MS/MS analysis.

| No | Accession  | Protein family    | Protein name                                          | Organism                              | Gel section        | Unique peptide |
|----|------------|-------------------|-------------------------------------------------------|---------------------------------------|--------------------|----------------|
| 1  | A0A077L7D6 | SVMP              | Metalloprotease P-IIIa (Fragment)                     | <i>Protobothrops elegans</i>          | B5-6               | 2              |
| 2  | A0A194AMC0 | <i>PIII Class</i> | Metalloproteinase type III 9b                         | <i>Agkistrodon piscivorus</i>         | B2, B5, B7, B8, B9 | 2-3            |
| 3  | A0A194ARK7 |                   | Metalloproteinase type III 8                          | <i>Agkistrodon piscivorus</i>         | B5                 | 2              |
| 4  | A0A194APM5 |                   | Metalloproteinase type III 9b                         | <i>Sistrurus tergeminus</i>           | B4                 | 2              |
| 5  | P0C6E8     |                   | Zinc metalloproteinase/disintegrin (Fragment)         | <i>Trimeresurus gramineus</i>         | B8                 | 2              |
| 6  | Q8JIR2     |                   | Zinc metalloproteinase/disintegrin-like HR1a          | <i>Protobothrops flavoviridis</i>     | B4                 | 2              |
| 7  | Q3HTN1     |                   | Zinc metalloproteinase-disintegrin-like stejnihagin-A | <i>Trimeresurus stejnegeri</i>        | B4-6               | 2-4            |
| 8  | Q3HTN2     |                   | Zinc metalloproteinase-disintegrin-like stejnihagin-B | <i>Trimeresurus stejnegeri</i>        | B3                 | 2              |
| 9  | Q2LD49     |                   | Zinc metalloproteinase-disintegrin-like TSV-DM        | <i>Trimeresurus stejnegeri</i>        | B2-9               | 2-7            |
| 10 | A0A1W7RJX8 | <i>PII Class</i>  | Metalloproteinase (Type II) 1                         | <i>Agkistrodon contortrix</i>         | B9                 | 2              |
| 11 | P0C6B6     |                   | Zinc metalloproteinase homolog-disintegrin albolatin  | <i>Trimeresurus albolabris</i>        | B6-7               | 2-3            |
| 12 | P15503     |                   | Zinc metalloproteinase/disintegrin                    | <i>Trimeresurus gramineus</i>         | B7                 | 2              |
| 13 | P0DM87     |                   | Zinc metalloproteinase-disintegrin stejnitin          | <i>Trimeresurus stejnegeri</i>        | B8                 | 3              |
| 14 | A0A1L8D5W6 |                   | Snake venom metalloproteinase                         | <i>Bothrops atrox</i>                 | B5                 | 2              |
| 15 | A0A194AS97 | CTL               | C-type lectin 10b                                     | <i>Sistrurus miliarius barbouri</i>   | B7-10              | 3-4            |
| 16 | T2HPS7     |                   | C-type lectin beta subunit (Fragment)                 | <i>Protobothrops flavoviridis</i>     | B9                 | 2              |
| 17 | Q9YGP1     |                   | C-type lectin TsL                                     | <i>Trimeresurus stejnegeri</i>        | B10                | 3              |
| 18 | P81111     |                   | Snaclec alboaggregin-A subunit alpha                  | <i>Trimeresurus albolabris</i>        | B10                | 2              |
| 19 | P81113     |                   | Snaclec alboaggregin-A subunit beta                   | <i>Trimeresurus albolabris</i>        | B7-10              | 2-5            |
| 20 | P81116     |                   | Snaclec alboaggregin-B subunit beta                   | <i>Trimeresurus albolabris</i>        | B4, B7             | 2              |
| 21 | P0DJL2     |                   | Snaclec purpureotin subunit alpha                     | <i>Trimeresurus purpureomaculatus</i> | B6, B7, B10        | 2-3            |
| 22 | P0DJL3     |                   | Snaclec purpureotin subunit beta                      | <i>Trimeresurus purpureomaculatus</i> | B8-10              | 2-4            |
| 23 | I2GAE3     |                   | CTLs subunit alpha (Fragment)                         | <i>Gloydius halys</i>                 | B10                | 2              |
| 24 | O13061     | SVSP              | Snake venom serine protease 2B                        | <i>Trimeresurus gramineus</i>         | B5-7               | 3-5            |
| 25 | Q91511     |                   | Beta-fibrinogenase mucrofibrase-5                     | <i>Protobothrops mucrosquamatus</i>   | B8                 | 3              |
| 26 | A7LAC6     |                   | Thrombin-like enzyme 1                                | <i>Trimeresurus albolabris</i>        | B4-8               | 2-7            |
| 27 | P0DJF6     |                   | Thrombin-like enzyme chitribisin                      | <i>Trimeresurus albolabris</i>        | B3                 | 2              |
| 28 | P0CJ41     |                   | Alpha-fibrinogenase albofibrase                       | <i>Trimeresurus albolabris</i>        | B4-9               | 2-7            |
| 29 | P0DJF5     |                   | Venom plasminogen activator GPV-PA                    | <i>Trimeresurus albolabris</i>        | B6-8               | 2              |

| No | Accession  | Protein family | Protein name                             | Organism                            | Gel section        | Unique peptide |
|----|------------|----------------|------------------------------------------|-------------------------------------|--------------------|----------------|
| 30 | A8CG87     | PLA2           | Acidic phospholipase A2 Drk-a2           | <i>Daboia russelii</i>              | B9                 | 2              |
| 31 | A0A0H3U206 |                | Phospholipase A2                         | <i>Trimeresurus albolabris</i>      | B9, B10            | 4-6            |
| 32 | A0A0H3U270 |                | Phospholipase A2                         | <i>Trimeresurus erythrurus</i>      | B10                | 2              |
| 33 | A7X4P4     |                | PLA2(IIA)-Aze2                           | <i>Azemiops feae</i>                | B4, B8             | 2              |
| 34 | K9N7B7     | LAAO           | L-amino acid oxidase Cdc18 (Fragment)    | <i>Crotalus durissus cumanensis</i> | B5                 | 2              |
| 35 | A0A194APV2 |                | L-amino acid oxidase                     | <i>Agkistrodon piscivorus</i>       | B10                | 2              |
| 36 | Q6WP39     |                | L-amino-acid oxidase                     | <i>Trimeresurus stejnegeri</i>      | B4, B5, B8         | 2              |
| 37 | A0A077L7M9 | 5'-NUC         | 5-nucleotidase                           | <i>Protobothrops flavoviridis</i>   | B3, B6             | 2-4            |
| 38 | A0A194APL9 |                | Snake venom 5'-nucleotidase              | <i>Agkistrodon piscivorus</i>       | B3                 | 3              |
| 39 | A0A068EPZ2 | AO             | Amine oxidase                            | <i>Gloydus intermedius</i>          | B3, B4, B5, B7, B8 | 3-4            |
| 40 | T2HRS5     |                | Amine oxidase                            | <i>Protobothrops flavoviridis</i>   | B2-9               | 2-8            |
| 41 | U3TDL2     | QPCT           | Glutaminyl cyclase (Fragment)            | <i>Ovophis okinavensi</i>           | B6, B7, B9         | 2-6            |
| 42 | A0A0K8S0L7 |                | Glutaminyl-peptide cyclotransferases     | <i>Crotalus horridus</i>            | B5                 | 10             |
| 43 | T2HQA0     | PDE            | Phosphodiesterase                        | <i>Protobothrops flavoviridis</i>   | B2, B4             | 2-4            |
| 44 | A0A1W7RB94 | PLB            | Phospholipase B-like                     | <i>Crotalus adamanteus</i>          | B5-B6              | 10-11          |
| 45 | F2Q6F7     | CRISP          | Cysteine-rich secretory protein Ts-CRPyA | <i>Trimeresurus stejnegeri</i>      | B3                 | 2              |
| 46 | A0A0F7ZB46 | Aminopeptidase | Aminopeptidase                           | <i>Crotalus adamanteus</i>          | B5                 | 5              |
| 47 | V8P395     | GPx            | Glutathione peroxidase (Fragment)        | <i>Ophiophagus hannah</i>           | B9                 | 3              |
| 48 | A0A2D4GG12 | Actin          | Uncharacterized protein                  | <i>Micrurus corallinus</i>          | B3                 | 4              |

SVMP, snake venom metalloproteinase; SVSP, snake venom serine protease; PLA2, phospholipase A2; CTL, snake Cc-type lectin; CRiSP, cysteine-rich protein; LAAO, L-amino acid oxidase; PDE, phosphodiesterase; NUC, 5'-nucleotidase; endonuclease, endonuclease domain-containing 1 protein; PLB, phospholipase B; AO, amine oxidase; QPCT, glutaminyl-peptide cyclotransferase; NGF, nerve growth factor; GPx, glutathione peroxidase
