# Supplementary material for: Venom composition of Trimeresurus albolabris, T. insularis, T. puniceus and T. purpureomaculatus from Indonesia
Source: PubMed Central journal article supplement (PMC9261747; doi:10.1590/1678-9199-jvatitd-2021-0103), 2022-07-06
Supplement: 1678-9199-jvatitd-28-e20210103-s3.pdf [file 1678-9199-jvatitd-28-e20210103-s3.pdf]

## Supplementary Material to “Venom composition of *Trimeresurus albolabris*, *T. insularis*, *T. puniceus* and *T. purpureomaculatus* from Indonesia”

**Additional file 3.** Summary of detected proteins from the in-gel digested proteins (gel sections 1–10) of *T. puniceus* venom by LC-MS/MS analysis.

| No | Accession  | Family name       | Protein name                                          | Organism                                 | Gel section    | Unique peptide |
|----|------------|-------------------|-------------------------------------------------------|------------------------------------------|----------------|----------------|
| 1  | A0A2I7YS46 | SVSP              | Serine endopeptidase                                  | <i>Crotalus lepidus</i>                  | C6             | 2              |
| 2  | Q71QH8     |                   | Serine protease CL4                                   | <i>Trimeresurus stejnegeri</i>           | C5             | 2              |
| 3  | A0A194ARH0 |                   | Serine proteinase 7                                   | <i>Agkistrodon piscivorus</i>            | C1- C6         | 2              |
| 4  | O13059     |                   | Snake venom serine protease 1                         | <i>Trimeresurus gramineus</i>            | C2-C4, C6-C10  | 2-4            |
| 5  | Q71QJ4     |                   | Snake venom serine protease homolog KN4               | <i>Trimeresurus stejnegeri</i>           | C4-C5          | 2              |
| 6  | B0ZT25     |                   | Snake venom serine protease homolog                   | <i>Protobothrops jerdonii</i>            | C1, C6         | 2              |
| 7  | Q71QI8     |                   | Snake venom serine protease KN10                      | <i>Trimeresurus stejnegeri</i>           | C6             | 2              |
| 8  | Q71QI5     |                   | Snake venom serine protease KN3                       | <i>Trimeresurus stejnegeri</i>           | C7             | 2              |
| 9  | P09872     |                   | Protein C activator                                   | <i>Agkistrodon contortrix contortrix</i> | C6             | 2              |
| 10 | P82981     |                   | Thrombin-like enzyme contortrixobin                   | <i>Agkistrodon contortrix contortrix</i> | C7-C8          | 2-3            |
| 11 | A0A286S0E6 |                   | Venom plasminogen activator 2                         | <i>Gloydius intermedius</i>              | C5-C6          | 2              |
| 12 | A0A077LA53 | SVMP              | Metalloprotease P-IIIc (Fragment)                     | <i>Protobothrops elegans</i>             | C1, C2, C4     | 2              |
| 13 | A0A098M132 | <i>PIII Class</i> | Metalloproteinase (Type III) 8c                       | <i>Hypsiglena</i> sp.                    | C2-C4          | 2              |
| 14 | A0A194APN3 |                   | Metalloproteinase type III 4c                         | <i>Sistrurus tergeminus</i>              | C2-C3          | 2              |
| 15 | A0A194APN1 |                   | Metalloproteinase type III 7                          | <i>Agkistrodon piscivorus</i>            | C2-C4, C8      | 2              |
| 16 | A0A194APM5 |                   | Metalloproteinase type III 9b                         | <i>Sistrurus tergeminus</i>              | C7             | 2              |
| 17 | Q90ZI3     |                   | Zinc metalloproteinase-disintegrin-like HV1           | <i>Protobothrops flavoviridis</i>        | C1, C2, C4, C5 | 2-5            |
| 18 | Q3HTN2     |                   | Zinc metalloproteinase-disintegrin-like stejnihagin-B | <i>Trimeresurus stejnegeri</i>           | C4             | 2              |
| 19 | G1UJB2     |                   | Flavorase                                             | <i>Protobothrops flavoviridis</i>        | C4-C6          | 2              |
| 20 | E9JG84     | <i>PII Class</i>  | Metalloproteinase                                     | <i>Echis coloratus</i>                   | C2-C4          | 2              |
| 21 | T2HRS1     |                   | p-II metalloprotease (Fragment)                       | <i>Protobothrops flavoviridis</i>        | C3-C4          | 2              |
| 22 | P0DM87     |                   | Zinc metalloproteinase-disintegrin stejnitin          | <i>Trimeresurus stejnegeri</i>           | C6-C7          | 2-3            |
| 23 | Q2LD49     |                   | Zinc metalloproteinase-disintegrin-like TSV-DM        | <i>Trimeresurus stejnegeri</i>           | C6-C7          | 3              |
| 24 | Q2YHJ6     | PLA2              | Acidic phospholipase A2 Tpu-E6a                       | <i>Trimeresurus puniceus</i>             | C10            | 2              |
| 25 | Q2YHJ5     |                   | Acidic phospholipase A2 Tpu-E6b                       | <i>Trimeresurus puniceus</i>             | C1, C10        | 2-5            |
| 26 | P04361     |                   | Basic phospholipase A2 homolog                        | <i>Agkistrodon piscivorus piscivorus</i> | C10            | 2              |

| No | Accession  | Family name                 | Protein name                                            | Organism                                | Gel section                | Unique peptide |
|----|------------|-----------------------------|---------------------------------------------------------|-----------------------------------------|----------------------------|----------------|
| 27 | Q2YHJ9     |                             | Basic phospholipase A2 homolog Tpu-K49a                 | <i>Trimeresurus puniceus</i>            | C1, C7, C10                | 2-4            |
| 28 | Q2YHJ8     |                             | Basic phospholipase A2 homolog Tpu-K49b                 | <i>Trimeresurus puniceus</i>            | C1- C6, C9, C10            | 2-5            |
| 29 | Q2YHJ2     |                             | Basic phospholipase A2 Tbo-G6D49                        | <i>Trimeresurus borneensis</i>          | C2-C4, C6, C10             | 2              |
| 30 | Q2YHJ7     |                             | Basic phospholipase A2 Tpu-G6D49                        | <i>Trimeresurus puniceus</i>            | C1                         | 2              |
| 31 | Q6H3C5     |                             | Basic phospholipase A2 Ts-G6D49                         | <i>Trimeresurus stejneger</i>           | C1, C10                    | 2              |
| 32 | A0A194AS97 | CTL                         | C-type lectin 10b                                       | <i>Sistrurus miliarius barbouri</i>     | C1, C2, C6, C10            | 2-3            |
| 33 | T2HPS7     |                             | C-type lectin beta subunit (Fragment)                   | <i>Protobothrops flavoviridis</i>       | C1, C10                    | 2              |
| 34 | P0DM38     |                             | Snaclec alboaggregin-D subunit alpha                    | <i>Trimeresurus albolabris</i>          | C10                        | 2              |
| 35 | Q7LZ71     |                             | Snaclec coagulation factor IX-binding protein subunit A | <i>Protobothrops flavoviridis</i>       | C1, C10                    | 2-4            |
| 36 | P0DJL2     |                             | Snaclec purpureotin subunit alpha                       | <i>Trimeresurus purpureomaculatus</i>   | C10                        | 6              |
| 37 | P0DJL3     |                             | Snaclec purpureotin subunit beta                        | <i>Trimeresurus purpureomaculatus</i>   | C10                        | 5              |
| 38 | U3T7C6     |                             | 5'-NUC                                                  | 5'-nucleotidase (Fragment)              | <i>Ovophis okinavensis</i> | C6             |
| 39 | A0A077L7M9 | 5'-nucleotidase             |                                                         | <i>Protobothrops flavoviridis</i>       | C5                         | 4              |
| 40 | A0A194ASY3 | Ecto-5'-nucleotidase        |                                                         | <i>Sistrurus miliarius barbouri</i>     | C1-C3                      | 3-6            |
| 41 | B6EWW8     | Snake venom 5'-nucleotidase |                                                         | <i>Gloydus brevicaudus</i>              | C1-C3, C7                  | 2              |
| 42 | A0A214HXH5 | Venom 5'-nucleotidase       |                                                         | <i>Naja atra</i>                        | C2-C3                      | 2              |
| 43 | F2Q6E5     | CRISP                       | Cysteine-rich secretory protein Ch-CRPKa (Fragment)     | <i>Crotalus horridus</i>                | C2, C6, C7, C9, C10        | 2              |
| 44 | F2Q6F7     |                             | Cysteine-rich secretory protein Ts-CRPyA                | <i>Trimeresurus stejnegeri</i>          | C5                         | 2              |
| 45 | A0A0A1WCN2 |                             | Cysteine-Rich Secretory Protein B                       | <i>Echis coloratus</i>                  | C1, C8, C9                 | 2              |
| 46 | K9N7B7     | LAAO                        | L-amino acid oxidase Cdc18 (Fragment)                   | <i>Crotalus durissus cumanensis</i>     | C4                         | 2              |
| 47 | Q6WP39     |                             | L-amino-acid oxidase                                    | <i>Trimeresurus stejnegeri</i>          | C1, C4, C5, C7             | 2              |
| 48 | A0A077LA64 | PDE                         | Phosphodiesterase                                       | <i>Protobothrops elegans</i>            | C1-C3                      | 2-3            |
| 49 | T2HPD6     |                             | Phosphodiesterase                                       | <i>Protobothrops flavoviridis</i>       | C2                         | 3              |
| 50 | T2HQ75     | PLB                         | Phospholipase B-like                                    | <i>Ovophis okinavensis</i>              | C5                         | 2              |
| 51 | A0A077L7E7 |                             | Phospholipase B-like                                    | <i>Protobothrops elegans</i>            | C1, C5                     | 2-3            |
| 52 | A0A077L6L4 | AO                          | Amine oxidase                                           | <i>Protobothrops elegans</i>            | C1, C4                     | 2              |
| 53 | T2HRS5     |                             | Amine oxidase                                           | <i>Protobothrops flavoviridis</i>       | C1-C8                      | 2-4            |
| 54 | A0A2D4ILH8 | ALP                         | Alkaline phosphatase                                    | <i>Micrurus lemniscatus lemniscatus</i> | C2                         | 2              |
| 55 | V8N8G0     |                             | Alkaline phosphatase (Fragment)                         | <i>Ophiophagus hannah</i>               | C2                         | 3              |
| 56 | U3FCT9     | Endonuclease                | Endonuclease domain-containing 1 protein                | <i>Micrurus fulvius</i>                 | C7                         | 2              |
| 57 | U3TDL2     | QPCT                        | Glutaminyl_cyclase (Fragment)                           | <i>Ovophis okinavensis</i>              | C5-C7                      | 3-7            |
| 58 | V8P395     | GPX                         | Glutathione peroxidase (Fragment)                       | <i>Ophiophagus hannah</i>               | C8-C9                      | 3              |

SVMP, snake venom metalloproteinase; SVSP, snake venom serine protease; PLA2, phospholipase A2; CTL, snake C-type lectin; CRISP, cysteine-rich protein; LAAO, L-amino acid oxidase; PDE, phosphodiesterase; NUC, 5'-nucleotidase; endonuclease, endonuclease domain-containing 1 protein; PLB, phospholipase B; AO, amine oxidase; QPCT, glutaminyl-peptide cyclotransferase; NGF, nerve growth factor; GPx, glutathione peroxidase; ALP, alkaline phosphatase.
