# Supplementary material for: Venom composition of Trimeresurus albolabris, T. insularis, T. puniceus and T. purpureomaculatus from Indonesia
Source: PubMed Central journal article supplement (PMC9261747; doi:10.1590/1678-9199-jvatitd-2021-0103), 2022-07-06
Supplement: 1678-9199-jvatitd-28-e20210103-s4.pdf [file 1678-9199-jvatitd-28-e20210103-s4.pdf]

## Supplementary Material to “Venom composition of *Trimeresurus albolabris*, *T. insularis*, *T. puniceus* and *T. purpureomaculatus* from Indonesia”

**Additional file 4.** Summary of detected proteins from the in-gel digested proteins (gel sections 1–10) of *T. purpureomaculatus* venom by LC-MS/MS analysis.

| No | Accession  | Protein family    | Protein name                                          | Organism                                 | Gel section     | Unique peptide |
|----|------------|-------------------|-------------------------------------------------------|------------------------------------------|-----------------|----------------|
| 1  | E9KJZ5     | SVMP              | Group III snake venom metalloproteinase               | <i>Echis ocellatus</i>                   | D8              | 2              |
| 2  | A0A098M132 | <i>PIII Class</i> | Metalloproteinase (Type III) 8c                       | <i>Hypsiglena</i> sp.                    | D2-D6, D8       | 2              |
| 3  | A0A194AMC0 |                   | Metalloproteinase type III 9b                         | <i>Agkistrodon piscivorus</i>            | D5              | 2              |
| 4  | A0A194APM5 |                   | Metalloproteinase type III 9b                         | <i>Sistrurus tergeminus</i>              | D3, D5          | 2              |
| 5  | Q3HTN1     |                   | Zinc metalloproteinase-disintegrin-like stejnihagin-A | <i>Trimeresurus stejnegeri</i>           | D2-D9           | 2-7            |
| 6  | Q3HTN2     |                   | Zinc metalloproteinase-disintegrin-like stejnihagin-B | <i>Trimeresurus stejnegeri</i>           | D2-D6           | 2              |
| 7  | Q4VM08     |                   | Zinc metalloproteinase-disintegrin-like VLAIP-A       | <i>Macrovipera lebetina</i>              | D5              | 2              |
| 8  | E9JG84     | <i>PII Class</i>  | Metalloproteinase                                     | <i>Echis coloratus</i>                   | D3-D4           | 2              |
| 9  | A0A194ARM6 |                   | Metalloproteinase type II 4                           | <i>Agkistrodon piscivorus</i>            | D7              | 2              |
| 10 | P0C6B6     |                   | Zinc metalloproteinase homolog-disintegrin albolatin  | <i>Trimeresurus albolabris</i>           | D3, D5-D7, D9   | 2-4            |
| 11 | P15503     |                   | Zinc metalloproteinase/disintegrin                    | <i>Trimeresurus gramineus</i>            | D7, D8          | 2-3            |
| 12 | P83912     |                   | Zinc metalloproteinase-disintegrin jerdonitin         | <i>Protobothrops jerdonii</i>            | D10             | 2              |
| 13 | P0DM87     |                   | Zinc metalloproteinase-disintegrin stejnitin          | <i>Trimeresurus stejnegeri</i>           | D2, D5, D7, D9  | 2-4            |
| 14 | Q2LD49     |                   | Zinc metalloproteinase-disintegrin-like TSV-DM        | <i>Trimeresurus stejnegeri</i>           | D1- D9          | 3-6            |
| 15 | A0A1L8D5X7 |                   | Snake venom metalloproteinase                         | <i>Bothrops atrox</i>                    | D5              | 3              |
| 16 | P62383     |                   | Disintegrin trigramin-gamma                           | <i>Trimeresurus gramineus</i>            | D10             | 3              |
| 17 | A0A1L8D5W6 |                   | Snake venom metalloproteinase                         | <i>Bothrops atrox</i>                    | D2-D5           | 2-3            |
| 18 | A0A194AT10 | CTL               | C-type lectin 10a                                     | <i>Sistrurus miliarius barbouri</i>      | D8              | 6              |
| 19 | A0A194AS97 |                   | C-type lectin 10b                                     | <i>Sistrurus miliarius barbouri</i>      | D3, D6, D9, D10 | 2-4            |
| 20 | A0A1W7RK04 |                   | C-type lectin 8                                       | <i>Agkistrodon contortrix contortrix</i> | D10             | 2              |
| 21 | T2HPS7     |                   | C-type lectin beta subunit (Fragment)                 | <i>Protobothrops flavoviridis</i>        | D10             | 2              |
| 22 | A0A077LD73 |                   | C-type lectin F IX/X B                                | <i>Protobothrops flavoviridis</i>        | D10             | 2              |
| 23 | Q9YGP1     |                   | C-type lectin TsL                                     | <i>Trimeresurus stejnegeri</i>           | D5, D7, D8, D10 | 2-4            |
| 24 | B4XSZ1     |                   | Snaclec A16                                           | <i>Macrovipera lebetina</i>              | D10             | 2              |

| No | Accession  | Protein family | Protein name                                            | Organism                              | Gel section    | Unique peptide |
|----|------------|----------------|---------------------------------------------------------|---------------------------------------|----------------|----------------|
| 25 | P81116     |                | Snaclec alboaggregin-B subunit beta                     | <i>Trimeresurus albolabris</i>        | D6, D7         | 2-5            |
| 26 | P0DM38     |                | Snaclec alboaggregin-D subunit alpha                    | <i>Trimeresurus albolabris</i>        | D2-D10         | 3-6            |
| 27 | Q7LZ71     |                | Snaclec coagulation factor IX-binding protein subunit A | <i>Protothrops flavoviridis</i>       | D10            | 3              |
| 28 | P0DJL2     |                | Snaclec purpureotin subunit alpha                       | <i>Trimeresurus purpureomaculatus</i> | D2, D3, D5-D10 | 3-10           |
| 29 | P0DJL3     |                | Snaclec purpureotin subunit beta                        | <i>Trimeresurus purpureomaculatus</i> | D3, D8-D10     | 4-9            |
| 30 | G3DT18     | PLA2           | Acidic phospholipase A2 BmooPLA2                        | <i>Bothrops moojeni</i>               | D5             | 3              |
| 31 | A8E2V4     |                | Acidic phospholipase A2                                 | <i>Bothriechis schlegelii</i>         | D10            | 2              |
| 32 | Q2YHJ8     |                | Basic phospholipase A2 homolog Tpu-K49b                 | <i>Trimeresurus puniceus</i>          | D2, D10        | 2              |
| 33 | Q6H3C5     |                | Basic phospholipase A2 Ts-G6D49                         | <i>Trimeresurus stejnegeri</i>        | D10            | 2              |
| 34 | A0A0H3U206 |                | Phospholipase A2                                        | <i>Trimeresurus albolabris</i>        | D2, D3, D8-D10 | 2-6            |
| 35 | A0A0H3U270 |                | Phospholipase A2                                        | <i>Trimeresurus erythrurus</i>        | D10            | 2              |
| 36 | A0A0H3U265 |                | Phospholipase A2                                        | <i>Trimeresurus venustus</i>          | D10            | 2              |
| 37 | A0A2I7YS70 | SVSP           | Serine endopeptidase                                    | <i>Crotalus scutulatus</i>            | D2             | 2              |
| 38 | T2HPQ2     |                | Serine protease (Fragment)                              | <i>Ovophis okinavensis</i>            | D7             | 2              |
| 39 | O13061     |                | Snake venom serine protease 2B                          | <i>Trimeresurus gramineus</i>         | D5             | 3              |
| 40 | Q71QI8     |                | Snake venom serine protease KN10                        | <i>Trimeresurus stejnegeri</i>        | D7             | 2              |
| 41 | P0CJ41     |                | Alpha-fibrinogenase albofibrase                         | <i>Trimeresurus albolabris</i>        | D2-D10         | 4-10           |
| 42 | Q71QH9     |                | Snake venom serine protease KN14                        | <i>Trimeresurus stejnegeri</i>        | D5             | 2              |
| 43 | Q91508     |                | Beta-fibrinogenase microfibrase-2                       | <i>Protothrops mucrosquamatus</i>     | D7             | 2              |
| 44 | A7LAC6     |                | Thrombin-like enzyme 1                                  | <i>Trimeresurus albolabris</i>        | D2-D7          | 5-8            |
| 45 | A0A346CLX5 | PDE            | Phosphodiesterase (Fragment)                            | <i>Borikenophis portoricensis</i>     | D2-D3          | 2              |
| 46 | T1D6P7     |                | Phosphodiesterase                                       | <i>Crotalus horridus</i>              | D1             | 6              |
| 47 | W8E7D1     |                | Phosphodiesterase                                       | <i>Macrovipera lebetina</i>           | D2-D3          | 2-6            |
| 48 | T2HPD6     |                | Phosphodiesterase                                       | <i>Protothrops flavoviridis</i>       | D3             | 8              |
| 49 | K9N7B7     | LAAO           | L-amino acid oxidase Cdc18 (Fragment)                   | <i>Crotalus durissus cumanensis</i>   | D4             | 2              |
| 50 | Q6WP39     |                | L-amino-acid oxidase                                    | <i>Trimeresurus stejnegeri</i>        | D3-D4          | 2              |
| 51 | A0A077L7M9 | 5'-NUC         | 5-nucleotidase                                          | <i>Protothrops flavoviridis</i>       | D2-D3, D5, D7  | 3-6            |
| 52 | A0A194APL9 |                | Snake venom 5'-nucleotidase                             | <i>Agkistrodon piscivorus</i>         | D3             | 2              |
| 53 | A0A1W7RB94 | PLB            | Phospholipase B-like                                    | <i>Crotalus adamanteus</i>            | D5             | 4              |
| 54 | A0A077L7E7 |                | Phospholipase B-like                                    | <i>Protothrops elegans</i>            | D6-D7          | 3-4            |
| 55 | A0A068EPZ2 | AO             | Amine oxidase                                           | <i>Gloydus intermedius</i>            | D2-D5, D7      | 2-3            |
| 56 | T2HRS5     |                | Amine oxidase                                           | <i>Protothrops flavoviridis</i>       | D1-D9          | 2-8            |
| 57 | B6EWW5     | Aminopeptidase | Aminopeptidase                                          | <i>Gloydus brevicaudus</i>            | D2             | 7              |
| 58 | A0A077L6N8 |                | Aminopeptidase                                          | <i>Protothrops elegans</i>            | D1-D2          | 4-8            |
| 59 | U3TDL2     | QPCT           | Glutaminy1_cyclase (Fragment)                           | <i>Ovophis okinavensis</i>            | D4, D6-D7      | 3-8            |

| No | Accession  | Protein family          | Protein name                             | Organism                                 | Gel section | Unique peptide |
|----|------------|-------------------------|------------------------------------------|------------------------------------------|-------------|----------------|
| 60 | A0A0K8S0L7 |                         | Glutaminyl-peptide cyclotransferases     | <i>Crotalus horridus</i>                 | D5          | 12             |
| 61 | F2Q6F8     | CRISP                   | Cysteine-rich secretory protein Ts-CRPYb | <i>Trimeresurus stejnegeri</i>           | D8          | 2              |
| 62 | V8P395     | GPx                     | Glutathione peroxidase (Fragment)        | <i>Ophiophagus hannah</i>                | D9          | 2              |
| 63 | A0A1W7REM3 | Cyclophilin-type PPIase | Peptidyl-prolyl cis-trans isomerase      | <i>Agkistrodon contortrix contortrix</i> | D9          | 3              |
| 64 | V8N4Y2     | Endonuclease            | Endonuclease domain-containing 1 protein | <i>Ophiophagus hannah</i>                | D6-D7       | 2-3            |
| 65 | T2HPR2     | NGF                     | Nerve growth factor                      | <i>Ovophis okinavensis</i>               | D10         | 2              |

SVMP, snake venom metalloproteinase; SVSP, snake venom serine protease; PLA2, phospholipase A2; CTL, snake C-type lectin; CRiSP, cysteine-rich protein; LAAO, L-amino acid oxidase; PDE, phosphodiesterase; NUC, 5'-nucleotidase; endonuclease, endonuclease domain-containing 1 protein; PLB, phospholipase B; AO, amine oxidase; QPCT, glutaminyl-peptide cyclotransferase; NGF, nerve growth factor; GPx, glutathione peroxidase.
